# Supplementary material
Source: publisher figshare collection journal article supplement (https://gsapubs.figshare.com/ndownloader/files/23300486)
Supplement: Supplementary file 1 [file 23300486]

Table DR2. Data used in this study from published material. Sample column is the original author's sample number. Groups column shows how the previously published sample plots with our groups.

Mackinder (2014)

| Sample | Groups  | Sample | Groups  | Sample  | Groups  |
|--------|---------|--------|---------|---------|---------|
| AM-01  | Group01 | AM-12  | Group01 | LAAT2-A | Group01 |
| AM-02  | Group01 | AM-13  | Group01 | LAAT2-B | Group01 |
| AM-03  | Group01 | AM-14  | Group01 | LAAT2-C | Group01 |
| AM-05B | Group01 | AM-15  | Group01 | MT-01   | Group01 |
| AM-11  | Group01 | AM-26B | Group01 | MT-02   | Group01 |

Anderson and Goodfellow, (2000)

| Sample  | Groups  | Sample      | Groups  | Sample     | Groups  |
|---------|---------|-------------|---------|------------|---------|
| AZ-02b  | Group05 | AZ-6448-11A | Group03 | AZ-44A     | Group05 |
| AZ-03a  | Group05 | AZ-6448-14  | Group03 | AZ-45A     | Group05 |
| AZ-03c  | Group05 | AZ-6464-02  | Group02 | AZ-46a     | Group02 |
| AZ-06   | Group05 | AZ-6464-04  | Group03 | AZ-46b     | Group02 |
| AZ-07   | Group03 | AZ-65       | Group05 | AZ-49      | Group05 |
| AZ-09A  | Group02 | AZ-6799-01  | Group04 | AZ-51C     | Group02 |
| AZ-10   | Group02 | AZ-6799-04  | Group04 | AZ-52      | Group02 |
| AZ-100  | Group03 | AZ-6799-06  | Group04 | AZ-54a     | Group02 |
| AZ-101  | Group03 | AZ-6799-08  | Group04 | AZ-54b     | Group02 |
| AZ-102  | Group03 | AZ-6799-10  | Group05 | AZ-56      | Group05 |
| AZ-105B | Group03 | AZ-6799-12  | Group05 | AZ-57      | Group05 |
| AZ-106B | Group03 | AZ-6799-15  | Group05 | AZ-58      | Group05 |
| AZ-11   | Group02 | AZ-6799-16  | Group05 | AZ-59      | Group05 |
| AZ-16   | Group05 | AZ-6799-18  | Group05 | AZ-63B     | Group05 |
| AZ-18B  | Group05 | AZ-6799-19  | Group05 | AZ-64      | Group05 |
| AZ-18C  | Group05 | AZ-68       | Group05 | AZ-6448-01 | Group02 |
| AZ-19   | Group05 | AZ-70       | Group05 | AZ-6448-03 | Group02 |
| AZ-27   | Group04 | AZ-72       | Group05 | AZ-6448-04 | Group02 |
| AZ-28   | Group04 | AZ-74A      | Group03 | AZ-6448-05 | Group02 |
| AZ-29A  | Group03 | AZ-75       | Group04 | AZ-6448-06 | Group02 |
| AZ-35   | Group05 | AZ-78a      | Group03 | AZ-6448-07 | Group03 |
| AZ-37   | Group05 | AZ-78B      | Group03 | AZ-6448-08 | Group03 |
| AZ-38   | Group05 | AZ-79       | Group03 | AZ-6448-09 | Group03 |
| AZ-40   | Group05 | AZ-80       | Group03 | AZ-6448-10 | Group03 |
| AZ-41   | Group05 | AZ-81       | Group03 |            |         |

Table DR2. Data used in this study from published material. Sample column is the original author's sample number. Groups column shows how the previously published sample plots with our groups.

| Sample  | Groups  |
|---------|---------|
| MT-03   | Group01 |
| MT-09   | Group01 |
| MT-10   | Group01 |
| T003-1A | Group01 |
| T1-2A   | Group01 |

| Sample      | Groups  |
|-------------|---------|
| AZ-82       | Group03 |
| AZ-83       | Group03 |
| AZ-84       | Group04 |
| AZ-85       | Group03 |
| AZ-C83-1-1  | Group04 |
| AZ-C83-1-5  | Group04 |
| AZ-C83-1-6  | Group04 |
| AZ-C83-1-7  | Group05 |
| AZ-C83-1-8  | Group04 |
| AZ-C91-2-1  | Group03 |
| AZ-C91-3-1  | Group03 |
| AZ-C91-3-2  | Group03 |
| AZ-C91-3-3  | Group03 |
| AZ-C91-3-4  | Group03 |
| AZ-C91-3-6  | Group03 |
| AZ-MM91-1-1 | Group03 |
| AZ-MM91-1-2 | Group03 |
| AZ-MM91-1-3 | Group03 |
| AZ-MM91-1-4 | Group03 |
| AZ-MM91-1-5 | Group03 |
| AZ-MM91-1-6 | Group03 |
| AZ-MM91-1-8 | Group03 |
| AZ-MM91-1-9 | Group03 |
| AZ-N85-1-6  | Group03 |
